# Supplementary material for: A robust ambient temperature collection and stabilization strategy: Enabling worldwide functional studies of the human microbiome
Source: PubMed Central journal article supplement (PMC4997331; doi:10.1038/srep31731), 2016-08-25
Supplement: srep31731-s1.pdf [file srep31731-s1.pdf]

A robust ambient temperature collection and stabilization strategy: Enabling worldwide functional studies of the human microbiome

Ericka L. Anderson<sup>1\*</sup>, Weizhong Li<sup>1,2</sup>, Niels Klitgord<sup>1</sup>, Sarah K. Highlander<sup>2</sup>, Mark Dayrit<sup>1</sup>, Victor Seguritan<sup>1</sup>, Shibu Yooseph<sup>1,2</sup>, William Biggs<sup>1</sup>, J. Craig Venter<sup>1,2</sup>, Karen E. Nelson<sup>1,2</sup>, Marcus B. Jones<sup>1</sup>

<sup>1</sup> Human Longevity, Inc., San Diego, CA 92121.

<sup>2</sup> Genomic Medicine, J. Craig Venter Institute, La Jolla, CA 92037.

\* Corresponding Author, [eanderson@humanlongevity.com](mailto:eanderson@humanlongevity.com)

Supplemental Information

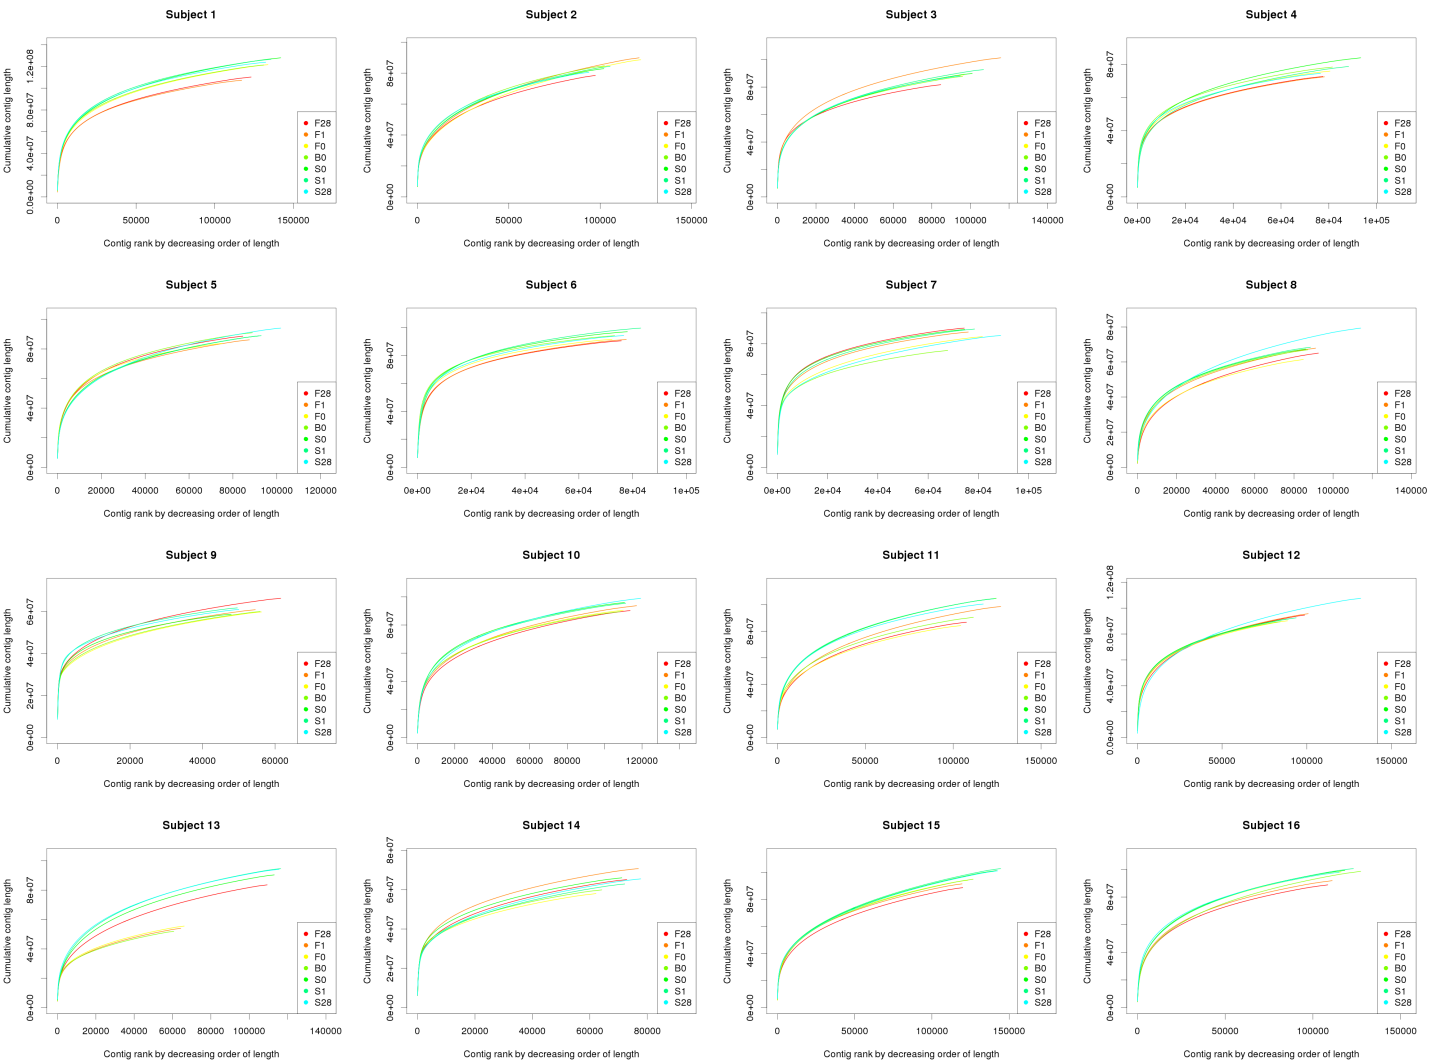

Supplemental Figure S1. Assembly Metrics are unaffected by stabilization method. Total contig length is plotted against contig rank in the order of decreasing length for all individual subjects. B0: Basal; F0, F1, F28: Frozen Day 0, Day 1, and Day 28; S0, S1, S28: Stabilized Day 0, Day 1, and Day 28.

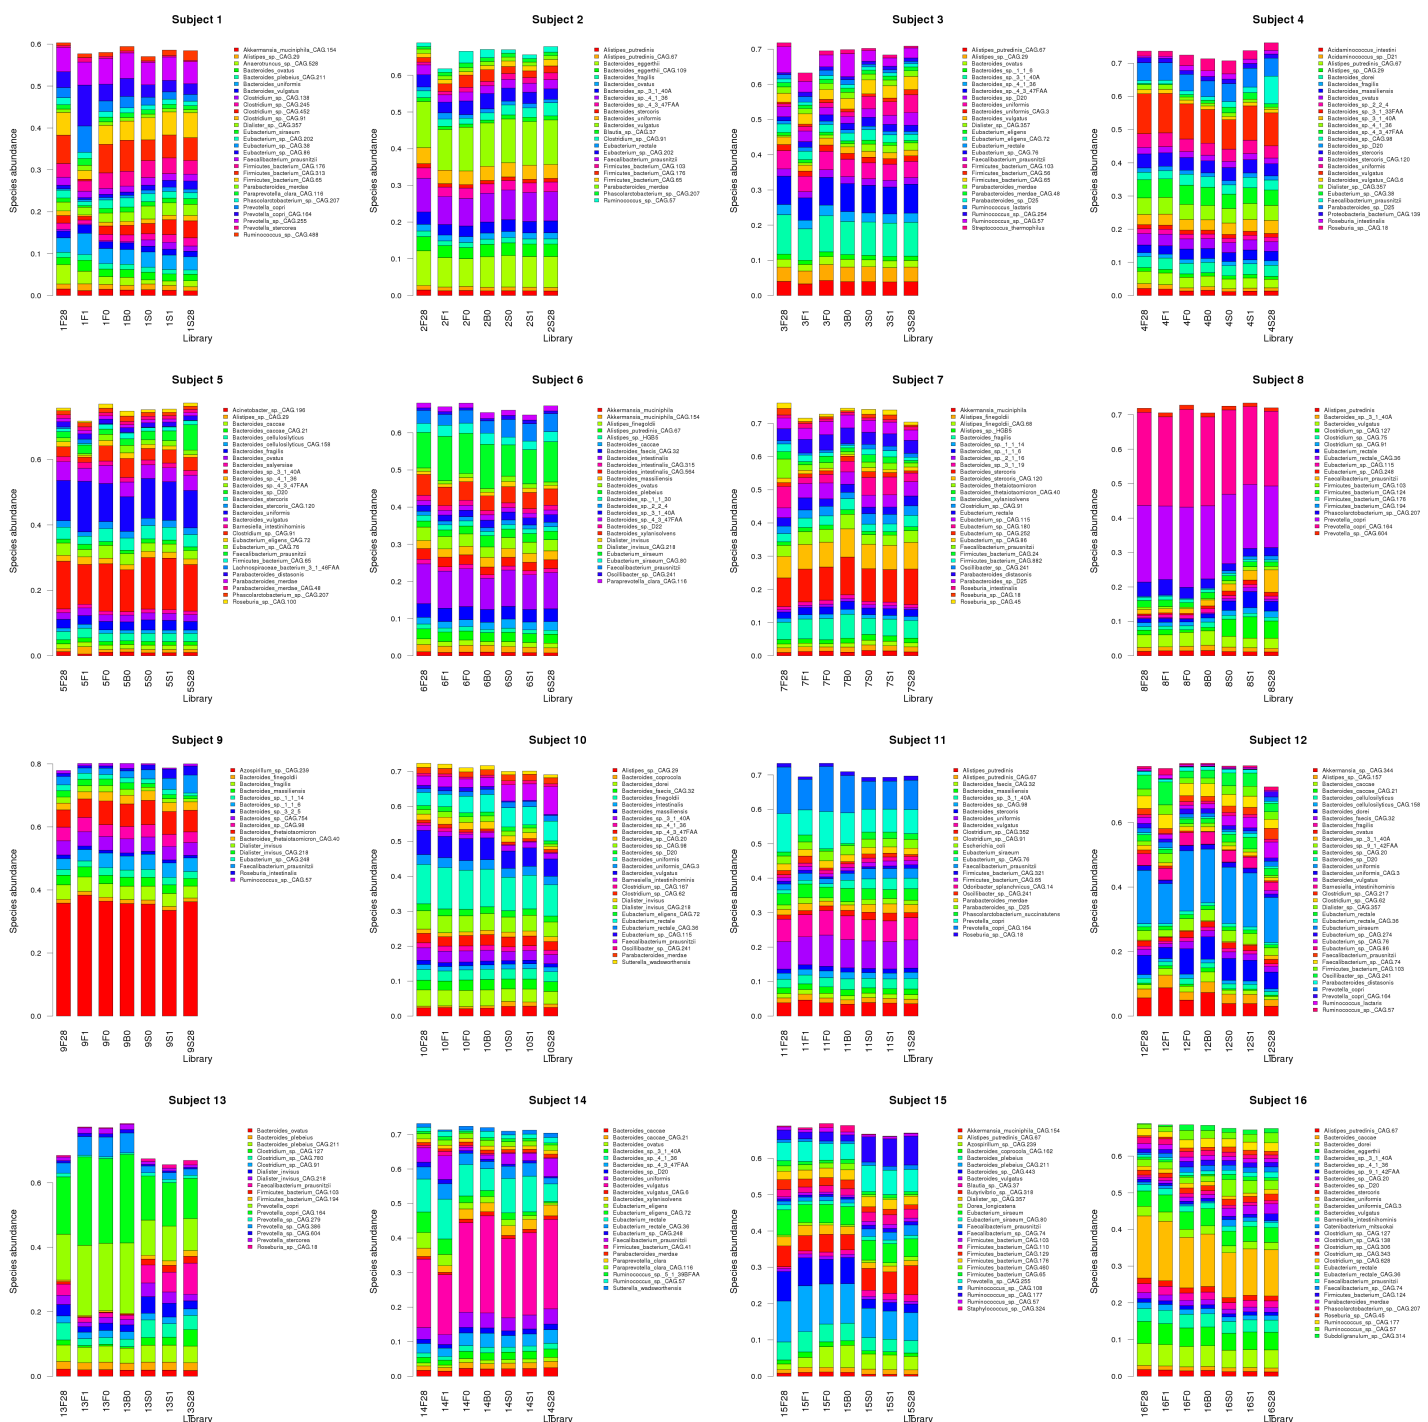

Supplemental Figure S2. Relative species abundance of individual subjects. Species abundance is plotted for Frozen, Basal, and Stabilized samples from each individual subject. B0: Basal; F0, F1, F28: Frozen Day 0, Day 1, and Day 28; S0, S1, S28: Stabilized Day 0, Day 1, and Day 28.

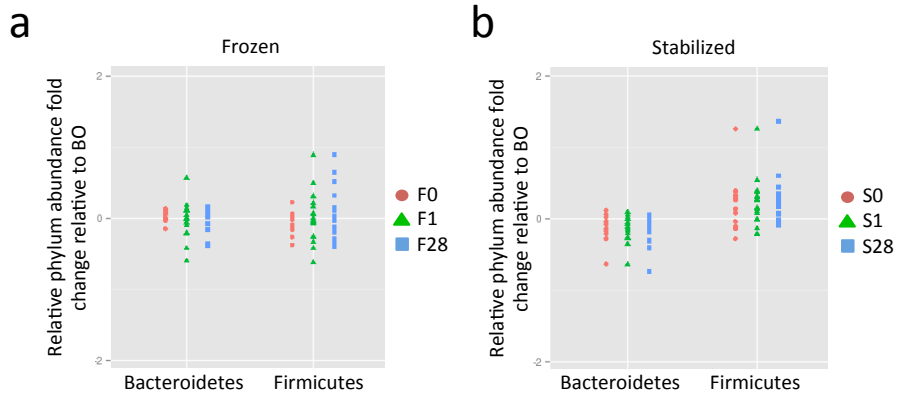

Supplemental Figure S3. Bacteroidetes and Firmicutes phyla are unchanged relative to Basal in Frozen and Stabilized samples. Fold change in Bacteroidetes or Firmicutes phyla relative to Basal across the time course in (a) Frozen or (b) Stabilized samples. F0, F1, F28: Frozen Day 0, Day 1, and Day 28; S0, S1, S28: Stabilized Day 0, Day 1, and Day 28.

**a**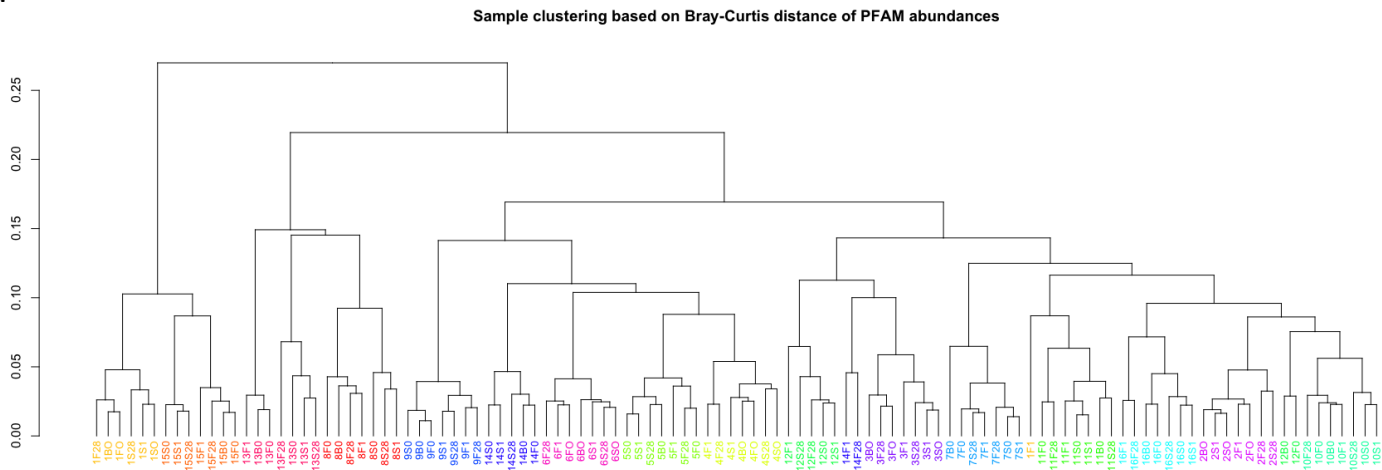**b**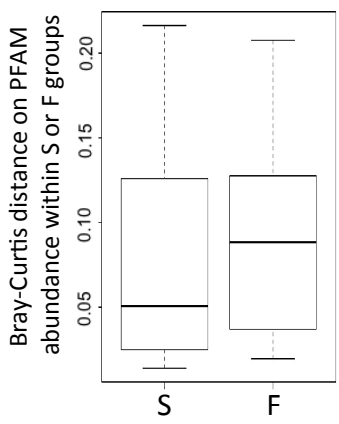**c**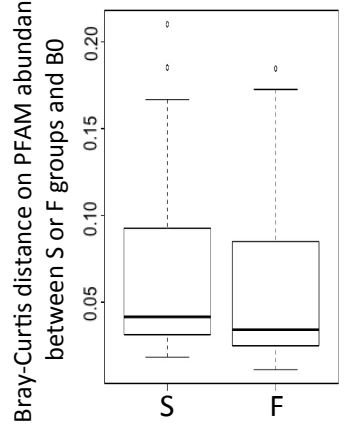

Supplemental Figure S4. Stabilized samples maintain results of Basal and Frozen Pfam analysis. (a) Bray-Curtis dissimilarity based on relative Pfam abundances were used to cluster all samples. Each color represents a distinct subject. (b) Box and whisker plots of calculated pairwise Bray-Curtis dissimilarity within stabilization method. (c) Box and whisker plots of calculated pairwise Bray-Curtis dissimilarity between Stabilized or Frozen samples and Basal. B0: Basal; F0, F1, F28: Frozen Day 0, Day 1, and Day 28; S0, S1, S28: Stabilized Day 0, Day 1, and Day 28; F: Frozen; S: Stabilized.

| <b>Supplemental Table S1. Sequencing metrics from RNA seq on a Stabilized stool sample</b> |                         |                         |
|--------------------------------------------------------------------------------------------|-------------------------|-------------------------|
| <b>Sample</b>                                                                              | <b>Stabilized RNA1A</b> | <b>Stabilized RNA1B</b> |
| <b>% rRNA</b>                                                                              | 0.0165                  | 0.0665                  |
| <b>total rRNA</b>                                                                          | 92743                   | 255013                  |
| <b># 23S reads</b>                                                                         | 62656                   | 174727                  |
| <b># 16S reads</b>                                                                         | 28573                   | 79021                   |
| <b># 5S reads</b>                                                                          | 1514                    | 1265                    |
| <b># unmapped reads</b>                                                                    | 807651                  | 589168                  |
| <b># Viruses reads</b>                                                                     | 656                     | 859                     |
| <b># Eukaryota reads</b>                                                                   | 903                     | 1341                    |
| <b># Archaea reads</b>                                                                     | 83                      | 56                      |
| <b># Bacteria reads</b>                                                                    | 4824571                 | 3240490                 |
| <b># mapped reads</b>                                                                      | 4826194                 | 3242791                 |
| <b># non-human reads (pair)</b>                                                            | 5633845                 | 3831959                 |
| <b># human reads (pair)</b>                                                                | 9168                    | 13895                   |
| <b># of Low quality reads</b>                                                              | 0.2722                  | 0.361                   |
| <b># good reads (pair)</b>                                                                 | 5643013                 | 3845854                 |
| <b>Raw reads (GB)</b>                                                                      | 1.938483                | 1.50487                 |
| <b># raw reads (pair)</b>                                                                  | 7753933                 | 6019481                 |

**Sequencing metrics from an RNASeq Stabilized sample.**

Sequencing metrics were tabulated for sequencing libraries made from two replicate RNA extractions from a single Stabilized sample.

Supplemental Table S2. Individual Sample QC and sequencing metrics

| Sample | Number passed reads (pair) | Fraction of Low quality reads | % Duplicated reads | Number mapped reads | Number unmapped reads | Number of non-human reads (pair) | % human reads (pair) | % Bacteria reads | % Archaea reads | % Eukaryota reads | % Virus reads | Total contig length (bp) | Contig N50 (bp) | Longest contig (bp) |
|--------|----------------------------|-------------------------------|--------------------|---------------------|-----------------------|----------------------------------|----------------------|------------------|-----------------|-------------------|---------------|--------------------------|-----------------|---------------------|
| 1B0    | 1.7E+07                    | 0.1517                        | 15.87              | 1.3E+07             | 4.0E+06               | 1.7E+07                          | 0.26                 | 76.15            | 0.154           | 0.04              | 0.007         | 2.09E+08                 | 4280            | 5.72E+05            |
| 2B0    | 2.3E+07                    | 0.147                         | 9.50               | 1.9E+07             | 3.9E+06               | 2.3E+07                          | 0.04                 | 82.60            | 0.002           | 0.00              | 0.007         | 1.91E+08                 | 4073            | 3.27E+05            |
| 3B0    | 2.7E+07                    | 0.2004                        | 11.72              | 2.4E+07             | 3.7E+06               | 2.7E+07                          | 0.01                 | 86.64            | 0.002           | 0.01              | 0.001         | 1.96E+08                 | 3630            | 3.61E+05            |
| 4B0    | 2.3E+07                    | 0.1594                        | 9.61               | 2.2E+07             | 1.9E+06               | 2.3E+07                          | 0.05                 | 91.72            | 0.000           | 0.00              | 0.002         | 1.51E+08                 | 3382            | 8.13E+05            |
| 5B0    | 2.4E+07                    | 0.1856                        | 10.63              | 2.1E+07             | 3.0E+06               | 2.4E+07                          | 0.01                 | 87.32            | 0.001           | 0.00              | 0.001         | 1.70E+08                 | 5651            | 4.44E+05            |
| 6B0    | 1.7E+07                    | 0.1588                        | 11.29              | 1.5E+07             | 2.4E+06               | 1.7E+07                          | 0.02                 | 86.19            | 0.020           | 0.00              | 0.007         | 1.38E+08                 | 11349           | 4.10E+05            |
| 7B0    | 2.2E+07                    | 0.1645                        | 10.43              | 1.9E+07             | 3.1E+06               | 2.2E+07                          | 0.08                 | 85.76            | 0.001           | 0.00              | 0.002         | 1.34E+08                 | 8773            | 1.09E+06            |
| 8B0    | 1.9E+07                    | 0.1682                        | 9.97               | 1.4E+07             | 4.6E+06               | 1.9E+07                          | 0.03                 | 75.16            | 0.025           | 0.00              | 0.003         | 1.42E+08                 | 2191            | 2.54E+05            |
| 9B0    | 2.5E+07                    | 0.2145                        | 12.92              | 2.1E+07             | 3.9E+06               | 2.5E+07                          | 0.07                 | 84.06            | 0.001           | 0.00              | 0.000         | 1.17E+08                 | 4527            | 8.02E+05            |
| 10B0   | 2.3E+07                    | 0.189                         | 10.22              | 2.0E+07             | 3.2E+06               | 2.3E+07                          | 0.02                 | 86.20            | 0.001           | 0.05              | 0.001         | 1.80E+08                 | 2580            | 4.74E+05            |
| 11B0   | 2.1E+07                    | 0.2239                        | 15.56              | 1.7E+07             | 4.1E+06               | 2.1E+07                          | 0.09                 | 80.11            | 0.001           | 0.01              | 0.002         | 1.70E+08                 | 2654            | 3.28E+05            |
| 12B0   | 1.9E+07                    | 0.2228                        | 10.28              | 1.7E+07             | 2.5E+06               | 1.9E+07                          | 0.06                 | 86.91            | 0.001           | 0.00              | 0.000         | 1.49E+08                 | 4770            | 4.13E+05            |
| 13B0   | 2.1E+07                    | 0.2581                        | 11.28              | 1.6E+07             | 5.2E+06               | 2.1E+07                          | 0.12                 | 74.70            | 0.002           | 0.01              | 0.000         | 1.11E+08                 | 1860            | 3.07E+05            |
| 14B0   | 2.2E+07                    | 0.2194                        | 8.86               | 1.9E+07             | 3.1E+06               | 2.2E+07                          | 0.03                 | 85.66            | 0.000           | 0.01              | 0.006         | 1.20E+08                 | 2457            | 4.65E+05            |
| 15B0   | 2.7E+07                    | 0.2129                        | 9.32               | 2.0E+07             | 6.4E+06               | 2.7E+07                          | 0.07                 | 75.59            | 0.076           | 0.03              | 0.007         | 2.53E+08                 | 1438            | 4.16E+05            |
| 16B0   | 2.3E+07                    | 0.2159                        | 11.44              | 1.9E+07             | 4.1E+06               | 2.3E+07                          | 0.02                 | 82.22            | 0.121           | 0.01              | 0.003         | 1.92E+08                 | 3450            | 6.28E+05            |
| 1F0    | 1.7E+07                    | 0.1577                        | 17.52              | 1.3E+07             | 4.1E+06               | 1.7E+07                          | 0.28                 | 75.77            | 0.153           | 0.04              | 0.007         | 2.10E+08                 | 3991            | 4.61E+05            |
| 2F0    | 3.2E+07                    | 0.2187                        | 11.16              | 2.6E+07             | 5.7E+06               | 3.2E+07                          | 0.11                 | 82.24            | 0.002           | 0.00              | 0.007         | 2.10E+08                 | 3991            | 4.61E+05            |
| 3F0    | 2.7E+07                    | 0.2046                        | 11.95              | 2.4E+07             | 3.4E+06               | 2.7E+07                          | 0.01                 | 87.33            | 0.002           | 0.01              | 0.001         | 2.39E+08                 | 2923            | 3.04E+05            |
| 4F0    | 2.4E+07                    | 0.1673                        | 10.29              | 2.2E+07             | 1.9E+06               | 2.4E+07                          | 0.03                 | 92.13            | 0.000           | 0.00              | 0.002         | 1.91E+08                 | 4055            | 4.66E+05            |
| 5F0    | 2.1E+07                    | 0.1714                        | 11.67              | 1.8E+07             | 2.3E+06               | 2.1E+07                          | 0.02                 | 89.04            | 0.001           | 0.00              | 0.001         | 1.47E+08                 | 3131            | 8.18E+05            |
| 6F0    | 1.7E+07                    | 0.1705                        | 13.38              | 1.5E+07             | 2.3E+06               | 1.7E+07                          | 0.04                 | 86.89            | 0.020           | 0.00              | 0.005         | 1.48E+08                 | 6546            | 4.44E+05            |
| 7F0    | 2.5E+07                    | 0.1786                        | 9.93               | 2.1E+07             | 3.8E+06               | 2.5E+07                          | 0.07                 | 84.41            | 0.001           | 0.00              | 0.002         | 1.30E+08                 | 12205           | 4.09E+05            |
| 8F0    | 1.9E+07                    | 0.1917                        | 12.97              | 1.5E+07             | 4.5E+06               | 1.9E+07                          | 0.03                 | 76.15            | 0.014           | 0.00              | 0.002         | 1.56E+08                 | 8306            | 8.94E+05            |
| 9F0    | 2.5E+07                    | 0.2031                        | 9.50               | 2.1E+07             | 3.8E+06               | 2.5E+07                          | 0.07                 | 84.40            | 0.001           | 0.00              | 0.000         | 1.28E+08                 | 2393            | 2.18E+05            |
| 10F0   | 2.4E+07                    | 0.1865                        | 10.21              | 2.1E+07             | 3.2E+06               | 2.4E+07                          | 0.03                 | 86.72            | 0.001           | 0.05              | 0.001         | 1.17E+08                 | 6024            | 8.01E+05            |
| 11F0   | 2.2E+07                    | 0.2278                        | 17.76              | 1.8E+07             | 4.1E+06               | 2.2E+07                          | 0.05                 | 81.51            | 0.001           | 0.01              | 0.001         | 1.85E+08                 | 2823            | 5.48E+05            |
| 12F0   | 2.1E+07                    | 0.2453                        | 10.58              | 1.8E+07             | 2.6E+06               | 2.1E+07                          | 0.03                 | 87.39            | 0.001           | 0.00              | 0.000         | 1.59E+08                 | 2996            | 3.28E+05            |

**Supplemental Table S2 cont'd**

|              |         |        |       |         |         |         |      |       |       |      |       |          |       |          |
|--------------|---------|--------|-------|---------|---------|---------|------|-------|-------|------|-------|----------|-------|----------|
| <b>13F0</b>  | 2.0E+07 | 0.2643 | 11.31 | 1.5E+07 | 5.0E+06 | 2.0E+07 | 0.03 | 75.17 | 0.002 | 0.00 | 0.000 | 1.54E+08 | 4684  | 3.91E+05 |
| <b>14F0</b>  | 2.1E+07 | 0.2129 | 8.84  | 1.8E+07 | 2.7E+06 | 2.1E+07 | 0.02 | 86.88 | 0.001 | 0.01 | 0.006 | 1.13E+08 | 2075  | 3.07E+05 |
| <b>15F0</b>  | 2.4E+07 | 0.2081 | 8.34  | 1.8E+07 | 5.8E+06 | 2.4E+07 | 0.07 | 75.99 | 0.060 | 0.02 | 0.007 | 1.11E+08 | 2790  | 4.65E+05 |
| <b>16F0</b>  | 1.9E+07 | 0.191  | 10.54 | 1.6E+07 | 3.5E+06 | 1.9E+07 | 0.03 | 81.73 | 0.135 | 0.01 | 0.005 | 2.35E+08 | 1605  | 3.83E+05 |
| <b>1F1</b>   | 1.5E+07 | 0.1733 | 24.34 | 1.3E+07 | 2.9E+06 | 1.5E+07 | 0.23 | 80.39 | 0.499 | 0.01 | 0.002 | 1.67E+08 | 3794  | 3.98E+05 |
| <b>2F1</b>   | 2.1E+07 | 0.173  | 14.65 | 1.7E+07 | 3.6E+06 | 2.1E+07 | 0.03 | 82.56 | 0.002 | 0.01 | 0.010 | 1.90E+08 | 3364  | 3.46E+05 |
| <b>3F1</b>   | 2.0E+07 | 0.1842 | 14.40 | 1.7E+07 | 2.9E+06 | 2.0E+07 | 0.02 | 85.09 | 0.002 | 0.01 | 0.002 | 1.95E+08 | 3944  | 4.17E+05 |
| <b>4F1</b>   | 2.1E+07 | 0.1721 | 9.64  | 1.9E+07 | 1.6E+06 | 2.1E+07 | 0.02 | 92.33 | 0.000 | 0.00 | 0.001 | 1.33E+08 | 2889  | 8.13E+05 |
| <b>5F1</b>   | 2.1E+07 | 0.2226 | 12.71 | 1.8E+07 | 3.1E+06 | 2.1E+07 | 0.02 | 85.32 | 0.001 | 0.00 | 0.003 | 1.64E+08 | 3911  | 4.73E+05 |
| <b>6F1</b>   | 1.8E+07 | 0.1906 | 16.11 | 1.5E+07 | 2.3E+06 | 1.8E+07 | 0.07 | 87.05 | 0.041 | 0.00 | 0.008 | 1.31E+08 | 10404 | 4.09E+05 |
| <b>7F1</b>   | 2.0E+07 | 0.1637 | 12.48 | 1.7E+07 | 3.1E+06 | 2.0E+07 | 0.05 | 84.40 | 0.001 | 0.00 | 0.002 | 1.42E+08 | 12646 | 8.94E+05 |
| <b>8F1</b>   | 2.1E+07 | 0.1979 | 12.78 | 1.6E+07 | 4.9E+06 | 2.1E+07 | 0.06 | 76.42 | 0.100 | 0.00 | 0.003 | 1.49E+08 | 2357  | 3.24E+05 |
| <b>9F1</b>   | 1.9E+07 | 0.1993 | 8.09  | 1.6E+07 | 3.2E+06 | 1.9E+07 | 0.15 | 83.36 | 0.001 | 0.00 | 0.000 | 1.07E+08 | 5507  | 5.73E+05 |
| <b>10F1</b>  | 2.9E+07 | 0.2074 | 11.88 | 2.5E+07 | 4.1E+06 | 2.9E+07 | 0.02 | 85.92 | 0.001 | 0.04 | 0.001 | 2.01E+08 | 2828  | 5.47E+05 |
| <b>11F1</b>  | 2.3E+07 | 0.2821 | 14.69 | 1.8E+07 | 4.4E+06 | 2.3E+07 | 0.10 | 80.79 | 0.002 | 0.01 | 0.002 | 1.92E+08 | 2637  | 3.63E+05 |
| <b>12F1</b>  | 1.8E+07 | 0.2687 | 14.66 | 1.5E+07 | 3.1E+06 | 1.8E+07 | 0.04 | 82.82 | 0.002 | 0.00 | 0.000 | 1.55E+08 | 4169  | 4.24E+05 |
| <b>13F1</b>  | 7.3E+06 | 0.2563 | 7.00  | 5.4E+06 | 1.8E+06 | 7.3E+06 | 0.03 | 74.95 | 0.002 | 0.01 | 0.000 | 5.69E+07 | 1560  | 2.24E+05 |
| <b>14F1</b>  | 2.4E+07 | 0.2817 | 9.61  | 2.0E+07 | 3.7E+06 | 2.3E+07 | 0.03 | 84.22 | 0.001 | 0.01 | 0.005 | 1.44E+08 | 2017  | 4.64E+05 |
| <b>15F1</b>  | 2.2E+07 | 0.1956 | 8.80  | 1.7E+07 | 5.0E+06 | 2.2E+07 | 0.06 | 76.82 | 0.190 | 0.02 | 0.006 | 2.16E+08 | 1550  | 3.73E+05 |
| <b>16F1</b>  | 1.8E+07 | 0.196  | 13.21 | 1.5E+07 | 3.0E+06 | 1.8E+07 | 0.02 | 83.52 | 0.308 | 0.01 | 0.004 | 1.57E+08 | 3459  | 2.89E+05 |
| <b>1F28</b>  | 1.4E+07 | 0.1694 | 26.87 | 1.1E+07 | 2.8E+06 | 1.4E+07 | 0.11 | 79.60 | 0.066 | 0.01 | 0.001 | 1.45E+08 | 2792  | 4.51E+05 |
| <b>2F28</b>  | 2.3E+07 | 0.1955 | 18.23 | 1.9E+07 | 4.6E+06 | 2.3E+07 | 0.03 | 79.96 | 0.003 | 0.01 | 0.013 | 1.69E+08 | 3224  | 2.71E+05 |
| <b>3F28</b>  | 2.5E+07 | 0.2418 | 17.85 | 2.1E+07 | 3.9E+06 | 2.5E+07 | 0.02 | 84.15 | 0.002 | 0.01 | 0.002 | 1.63E+08 | 3831  | 4.22E+05 |
| <b>4F28</b>  | 2.8E+07 | 0.2299 | 11.54 | 2.5E+07 | 2.9E+06 | 2.8E+07 | 0.01 | 89.58 | 0.001 | 0.00 | 0.003 | 1.42E+08 | 2939  | 8.18E+05 |
| <b>5F28</b>  | 2.6E+07 | 0.299  | 14.14 | 2.3E+07 | 3.8E+06 | 2.6E+07 | 0.01 | 85.76 | 0.002 | 0.00 | 0.001 | 1.56E+08 | 6474  | 4.16E+05 |
| <b>6F28</b>  | 2.2E+07 | 0.2164 | 13.06 | 1.7E+07 | 5.1E+06 | 2.2E+07 | 0.05 | 76.72 | 0.337 | 0.00 | 0.019 | 1.40E+08 | 13134 | 4.40E+05 |
| <b>7F28</b>  | 2.4E+07 | 0.2753 | 10.59 | 1.8E+07 | 5.8E+06 | 2.4E+07 | 0.12 | 75.61 | 0.003 | 0.01 | 0.007 | 1.49E+08 | 8002  | 1.09E+06 |
| <b>8F28</b>  | 2.3E+07 | 0.267  | 10.63 | 1.7E+07 | 5.7E+06 | 2.3E+07 | 0.05 | 74.79 | 0.480 | 0.01 | 0.009 | 1.64E+08 | 1576  | 2.77E+05 |
| <b>9F28</b>  | 2.4E+07 | 0.2435 | 10.30 | 2.0E+07 | 4.4E+06 | 2.4E+07 | 0.08 | 81.51 | 0.002 | 0.00 | 0.000 | 1.26E+08 | 4557  | 8.02E+05 |
| <b>10F28</b> | 2.2E+07 | 0.3223 | 11.62 | 1.7E+07 | 4.5E+06 | 2.2E+07 | 0.05 | 79.37 | 0.003 | 0.24 | 0.005 | 1.85E+08 | 2023  | 5.38E+05 |
| <b>11F28</b> | 1.8E+07 | 0.3082 | 30.59 | 1.3E+07 | 4.6E+06 | 1.8E+07 | 0.24 | 74.51 | 0.003 | 0.01 | 0.004 | 1.42E+08 | 3104  | 4.36E+05 |
| <b>12F28</b> | 1.6E+07 | 0.2724 | 13.66 | 1.3E+07 | 3.5E+06 | 1.6E+07 | 0.07 | 78.75 | 0.002 | 0.01 | 0.000 | 1.56E+08 | 4197  | 3.91E+05 |



## Supplemental Table S2 cont'd

|       |         |        |       |         |         |         |      |       |       |      |       |          |       |          |
|-------|---------|--------|-------|---------|---------|---------|------|-------|-------|------|-------|----------|-------|----------|
| 13F28 | 2.2E+07 | 0.3375 | 13.53 | 1.6E+07 | 5.2E+06 | 2.2E+07 | 0.11 | 75.93 | 0.003 | 0.01 | 0.001 | 1.59E+08 | 2740  | 2.54E+05 |
| 14F28 | 2.0E+07 | 0.3413 | 12.04 | 1.6E+07 | 4.0E+06 | 2.0E+07 | 0.03 | 80.07 | 0.001 | 0.02 | 0.005 | 1.20E+08 | 2730  | 4.65E+05 |
| 15F28 | 2.2E+07 | 0.2542 | 9.01  | 1.5E+07 | 6.7E+06 | 2.2E+07 | 0.08 | 67.92 | 1.523 | 0.01 | 0.009 | 2.19E+08 | 1396  | 4.38E+05 |
| 16F28 | 1.6E+07 | 0.2201 | 17.99 | 1.3E+07 | 3.2E+06 | 1.6E+07 | 0.03 | 78.64 | 1.772 | 0.01 | 0.007 | 1.38E+08 | 2988  | 3.33E+05 |
| 1S0   | 1.5E+07 | 0.1442 | 13.79 | 1.2E+07 | 3.8E+06 | 1.5E+07 | 0.10 | 75.13 | 0.135 | 0.02 | 0.005 | 2.10E+08 | 4170  | 6.07E+05 |
| 2S0   | 2.0E+07 | 0.1542 | 10.95 | 1.6E+07 | 3.5E+06 | 2.0E+07 | 0.01 | 82.43 | 0.002 | 0.00 | 0.007 | 1.76E+08 | 3455  | 2.92E+05 |
| 3S0   | 2.8E+07 | 0.2153 | 10.84 | 2.4E+07 | 3.9E+06 | 2.8E+07 | 0.01 | 86.22 | 0.002 | 0.00 | 0.001 | 2.10E+08 | 2876  | 3.62E+05 |
| 4S0   | 2.9E+07 | 0.1718 | 9.34  | 2.6E+07 | 2.4E+06 | 2.9E+07 | 0.01 | 91.58 | 0.001 | 0.00 | 0.002 | 1.71E+08 | 3865  | 8.18E+05 |
| 5S0   | 2.7E+07 | 0.1806 | 11.40 | 2.4E+07 | 3.1E+06 | 2.7E+07 | 0.01 | 88.55 | 0.001 | 0.00 | 0.000 | 1.88E+08 | 3957  | 5.01E+05 |
| 6S0   | 1.6E+07 | 0.162  | 11.11 | 1.4E+07 | 2.2E+06 | 1.6E+07 | 0.05 | 86.85 | 0.012 | 0.00 | 0.004 | 1.36E+08 | 10756 | 3.38E+05 |
| 7S0   | 2.3E+07 | 0.1712 | 9.38  | 1.9E+07 | 3.8E+06 | 2.3E+07 | 0.01 | 83.69 | 0.002 | 0.00 | 0.001 | 1.58E+08 | 8139  | 1.09E+06 |
| 8S0   | 1.9E+07 | 0.1757 | 9.43  | 1.4E+07 | 4.4E+06 | 1.9E+07 | 0.03 | 76.43 | 0.015 | 0.00 | 0.002 | 1.41E+08 | 2039  | 3.24E+05 |
| 9S0   | 2.4E+07 | 0.1834 | 8.92  | 2.1E+07 | 3.7E+06 | 2.4E+07 | 0.08 | 84.44 | 0.001 | 0.00 | 0.000 | 1.11E+08 | 5678  | 8.02E+05 |
| 10S0  | 2.1E+07 | 0.1723 | 9.56  | 1.8E+07 | 3.1E+06 | 2.1E+07 | 0.03 | 85.16 | 0.002 | 0.02 | 0.001 | 1.80E+08 | 2864  | 5.38E+05 |
| 11S0  | 2.2E+07 | 0.2429 | 12.13 | 1.8E+07 | 4.0E+06 | 2.2E+07 | 0.11 | 81.71 | 0.002 | 0.01 | 0.001 | 1.92E+08 | 3168  | 3.56E+05 |
| 12S0  | 1.8E+07 | 0.2314 | 8.79  | 1.6E+07 | 2.7E+06 | 1.8E+07 | 0.07 | 85.08 | 0.002 | 0.01 | 0.000 | 1.52E+08 | 4315  | 4.23E+05 |
| 13S0  | 6.8E+06 | 0.2731 | 6.05  | 5.0E+06 | 1.8E+06 | 6.8E+06 | 0.03 | 74.02 | 0.002 | 0.01 | 0.000 | 9.04E+07 | 1240  | 3.07E+05 |
| 14S0  | 2.1E+07 | 0.2131 | 8.24  | 1.8E+07 | 3.1E+06 | 2.1E+07 | 0.02 | 85.24 | 0.001 | 0.01 | 0.004 | 1.28E+08 | 2629  | 4.65E+05 |
| 15S0  | 2.2E+07 | 0.1952 | 7.79  | 1.7E+07 | 5.4E+06 | 2.2E+07 | 0.03 | 75.50 | 0.043 | 0.01 | 0.005 | 2.46E+08 | 1647  | 3.86E+05 |
| 16S0  | 1.9E+07 | 0.1899 | 9.82  | 1.6E+07 | 3.4E+06 | 1.9E+07 | 0.02 | 82.03 | 0.099 | 0.01 | 0.003 | 1.81E+08 | 3451  | 4.50E+05 |
| 1S1   | 1.2E+07 | 0.1385 | 12.59 | 9.2E+06 | 2.9E+06 | 1.2E+07 | 0.09 | 75.85 | 0.098 | 0.02 | 0.005 | 1.81E+08 | 3932  | 4.91E+05 |
| 2S1   | 1.8E+07 | 0.1524 | 10.25 | 1.5E+07 | 3.0E+06 | 1.8E+07 | 0.01 | 82.79 | 0.002 | 0.00 | 0.007 | 1.69E+08 | 2928  | 2.94E+05 |
| 3S1   | 2.6E+07 | 0.198  | 10.80 | 2.3E+07 | 3.5E+06 | 2.6E+07 | 0.01 | 86.35 | 0.002 | 0.01 | 0.001 | 2.10E+08 | 3061  | 3.62E+05 |
| 4S1   | 2.9E+07 | 0.1857 | 8.97  | 2.7E+07 | 2.2E+06 | 2.9E+07 | 0.01 | 92.46 | 0.001 | 0.00 | 0.001 | 1.61E+08 | 3212  | 7.37E+05 |
| 5S1   | 2.7E+07 | 0.187  | 11.01 | 2.4E+07 | 3.1E+06 | 2.7E+07 | 0.01 | 88.50 | 0.001 | 0.00 | 0.000 | 1.90E+08 | 3597  | 4.31E+05 |
| 6S1   | 2.1E+07 | 0.1708 | 10.15 | 1.8E+07 | 2.8E+06 | 2.1E+07 | 0.05 | 86.36 | 0.019 | 0.00 | 0.006 | 1.52E+08 | 11826 | 3.38E+05 |
| 7S1   | 2.3E+07 | 0.1714 | 9.03  | 1.9E+07 | 3.5E+06 | 2.3E+07 | 0.01 | 84.31 | 0.002 | 0.00 | 0.001 | 1.58E+08 | 7339  | 1.09E+06 |
| 8S1   | 1.8E+07 | 0.1738 | 9.33  | 1.4E+07 | 4.2E+06 | 1.8E+07 | 0.03 | 77.32 | 0.011 | 0.00 | 0.002 | 1.43E+08 | 1995  | 3.24E+05 |
| 9S1   | 2.3E+07 | 0.1812 | 8.39  | 1.9E+07 | 3.5E+06 | 2.3E+07 | 0.08 | 84.34 | 0.001 | 0.00 | 0.000 | 1.12E+08 | 5251  | 8.03E+05 |
| 10S1  | 2.4E+07 | 0.1686 | 9.57  | 2.0E+07 | 3.5E+06 | 2.4E+07 | 0.03 | 85.28 | 0.002 | 0.02 | 0.000 | 1.94E+08 | 2789  | 6.62E+05 |
| 11S1  | 2.0E+07 | 0.2246 | 12.57 | 1.6E+07 | 3.7E+06 | 2.0E+07 | 0.11 | 81.34 | 0.001 | 0.01 | 0.001 | 1.84E+08 | 3081  | 3.28E+05 |
| 12S1  | 2.0E+07 | 0.2254 | 9.11  | 1.7E+07 | 3.0E+06 | 2.0E+07 | 0.03 | 84.99 | 0.002 | 0.00 | 0.000 | 1.62E+08 | 3965  | 3.90E+05 |

## Supplemental Table S2 cont'd

|              |         |        |       |         |         |         |      |       |       |      |       |          |       |          |
|--------------|---------|--------|-------|---------|---------|---------|------|-------|-------|------|-------|----------|-------|----------|
| <b>13S1</b>  | 2.0E+07 | 0.2549 | 10.98 | 1.5E+07 | 5.3E+06 | 2.0E+07 | 0.03 | 74.15 | 0.002 | 0.01 | 0.000 | 1.81E+08 | 2728  | 4.92E+05 |
| <b>14S1</b>  | 2.1E+07 | 0.2205 | 8.33  | 1.8E+07 | 2.8E+06 | 2.1E+07 | 0.02 | 86.65 | 0.001 | 0.01 | 0.004 | 1.28E+08 | 2098  | 4.65E+05 |
| <b>15S1</b>  | 2.1E+07 | 0.1952 | 7.82  | 1.6E+07 | 5.1E+06 | 2.1E+07 | 0.03 | 75.50 | 0.041 | 0.01 | 0.004 | 2.40E+08 | 1610  | 3.86E+05 |
| <b>16S1</b>  | 1.9E+07 | 0.1819 | 9.65  | 1.6E+07 | 3.4E+06 | 1.9E+07 | 0.02 | 82.00 | 0.074 | 0.01 | 0.003 | 1.83E+08 | 3499  | 5.32E+05 |
| <b>1S28</b>  | 8.6E+06 | 0.1372 | 12.91 | 6.6E+06 | 2.0E+06 | 8.6E+06 | 0.12 | 76.25 | 0.062 | 0.02 | 0.005 | 1.46E+08 | 2757  | 7.23E+05 |
| <b>2S28</b>  | 1.2E+07 | 0.1412 | 8.84  | 9.6E+06 | 2.1E+06 | 1.2E+07 | 0.02 | 82.40 | 0.002 | 0.01 | 0.005 | 1.21E+08 | 2735  | 2.85E+05 |
| <b>3S28</b>  | 2.4E+07 | 0.1934 | 11.93 | 2.1E+07 | 3.1E+06 | 2.4E+07 | 0.01 | 86.87 | 0.002 | 0.01 | 0.001 | 1.88E+08 | 3033  | 3.56E+05 |
| <b>4S28</b>  | 2.7E+07 | 0.1732 | 9.82  | 2.5E+07 | 2.1E+06 | 2.7E+07 | 0.01 | 92.36 | 0.000 | 0.00 | 0.001 | 1.47E+08 | 3549  | 8.13E+05 |
| <b>5S28</b>  | 2.5E+07 | 0.2105 | 9.27  | 2.2E+07 | 2.9E+06 | 2.5E+07 | 0.01 | 88.67 | 0.001 | 0.00 | 0.000 | 1.77E+08 | 4192  | 3.60E+05 |
| <b>6S28</b>  | 1.6E+07 | 0.1607 | 10.79 | 1.4E+07 | 2.1E+06 | 1.6E+07 | 0.05 | 87.20 | 0.009 | 0.00 | 0.003 | 1.33E+08 | 10284 | 4.09E+05 |
| <b>7S28</b>  | 2.5E+07 | 0.236  | 11.43 | 2.1E+07 | 3.8E+06 | 2.5E+07 | 0.04 | 84.80 | 0.001 | 0.00 | 0.001 | 1.59E+08 | 5468  | 1.09E+06 |
| <b>8S28</b>  | 2.0E+07 | 0.1867 | 8.62  | 1.5E+07 | 4.7E+06 | 2.0E+07 | 0.03 | 76.69 | 0.017 | 0.00 | 0.002 | 1.70E+08 | 1564  | 3.24E+05 |
| <b>9S28</b>  | 2.3E+07 | 0.203  | 8.43  | 2.0E+07 | 3.5E+06 | 2.3E+07 | 0.07 | 84.89 | 0.001 | 0.00 | 0.000 | 1.11E+08 | 5656  | 6.21E+05 |
| <b>10S28</b> | 2.2E+07 | 0.1936 | 8.69  | 1.9E+07 | 3.3E+06 | 2.2E+07 | 0.03 | 84.72 | 0.002 | 0.02 | 0.001 | 1.94E+08 | 2483  | 4.74E+05 |
| <b>11S28</b> | 1.5E+07 | 0.2154 | 10.64 | 1.2E+07 | 2.7E+06 | 1.5E+07 | 0.09 | 81.81 | 0.001 | 0.01 | 0.001 | 1.57E+08 | 2855  | 3.28E+05 |
| <b>12S28</b> | 1.6E+07 | 0.2223 | 7.97  | 1.4E+07 | 2.6E+06 | 1.6E+07 | 0.06 | 84.26 | 0.001 | 0.00 | 0.000 | 1.82E+08 | 2063  | 3.83E+05 |
| <b>13S28</b> | 1.9E+07 | 0.2697 | 8.99  | 1.4E+07 | 4.7E+06 | 1.9E+07 | 0.03 | 75.30 | 0.002 | 0.01 | 0.000 | 1.76E+08 | 2477  | 5.28E+05 |
| <b>14S28</b> | 2.0E+07 | 0.2212 | 8.47  | 1.8E+07 | 2.5E+06 | 2.0E+07 | 0.02 | 87.68 | 0.000 | 0.01 | 0.004 | 1.31E+08 | 1981  | 4.65E+05 |
| <b>15S28</b> | 2.2E+07 | 0.2004 | 7.61  | 1.7E+07 | 5.1E+06 | 2.2E+07 | 0.03 | 76.63 | 0.027 | 0.01 | 0.004 | 2.42E+08 | 1635  | 3.87E+05 |
| <b>16S28</b> | 1.5E+07 | 0.1871 | 10.18 | 1.2E+07 | 2.6E+06 | 1.5E+07 | 0.02 | 81.74 | 0.086 | 0.01 | 0.004 | 1.56E+08 | 3270  | 3.98E+05 |

**Individual Sample Sequencing Metrics.** Sequencing metrics were tabulated for each sample. Averaged sequencing metrics are shown in Table 1.

**Supplementary Table S3. Sequencing assembly metrics**

| <b>Sample</b> | <b>Treatment</b> | <b>Subject</b> | <b>Number non-human reads for assembly (pair)</b> | <b>Total contig length (bp)</b> | <b>Contig N50 (bp)</b> | <b>Longest contig (bp)</b> |
|---------------|------------------|----------------|---------------------------------------------------|---------------------------------|------------------------|----------------------------|
| 1B0           | B0               | 1              | 6,747,334                                         | 121,352,726                     | 2,189                  | 110,081                    |
| 2B0           | B0               | 2              | 6,762,180                                         | 84,771,234                      | 1,398                  | 451,141                    |
| 3B0           | B0               | 3              | 6,764,056                                         | 87,833,571                      | 1,903                  | 251,829                    |
| 4B0           | B0               | 4              | 6,762,066                                         | 78,448,068                      | 2,768                  | 185,182                    |
| 5B0           | B0               | 5              | 6,764,199                                         | 90,952,224                      | 2,450                  | 272,345                    |
| 6B0           | B0               | 6              | 6,763,544                                         | 94,205,222                      | 6,952                  | 210,048                    |
| 7B0           | B0               | 7              | 6,759,682                                         | 75,589,632                      | 6,073                  | 236,758                    |
| 8B0           | B0               | 8              | 6,762,882                                         | 66,958,700                      | 1,515                  | 364,716                    |
| 9B0           | B0               | 9              | 6,760,203                                         | 60,027,286                      | 3,836                  | 361,176                    |
| 10B0          | B0               | 10             | 6,763,757                                         | 89,549,999                      | 1,756                  | 215,299                    |
| 11B0          | B0               | 11             | 6,758,786                                         | 90,521,351                      | 1,370                  | 230,787                    |
| 12B0          | B0               | 12             | 6,761,243                                         | 89,549,600                      | 2,599                  | 342,996                    |
| 13B0          | B0               | 13             | 6,756,597                                         | 51,930,157                      | 1,891                  | 359,668                    |
| 14B0          | B0               | 14             | 6,763,289                                         | 59,863,002                      | 2,981                  | 363,194                    |
| 15B0          | B0               | 15             | 6,760,612                                         | 94,799,537                      | 1,164                  | 469,211                    |
| 16B0          | B0               | 16             | 6,763,952                                         | 98,503,972                      | 1,246                  | 134,392                    |
| 1F0           | F0               | 1              | 6,745,916                                         | 121,687,862                     | 2,074                  | 117,508                    |
| 2F0           | F0               | 2              | 6,757,493                                         | 88,704,376                      | 987                    | 434,010                    |
| 3F0           | F0               | 3              | 6,764,309                                         | 88,990,759                      | 1,886                  | 217,752                    |
| 4F0           | F0               | 4              | 6,763,109                                         | 76,017,652                      | 2,486                  | 223,525                    |
| 5F0           | F0               | 5              | 6,763,983                                         | 83,704,561                      | 2,946                  | 277,815                    |
| 6F0           | F0               | 6              | 6,762,479                                         | 91,621,948                      | 6,195                  | 339,338                    |
| 7F0           | F0               | 7              | 6,760,357                                         | 84,575,506                      | 4,044                  | 206,096                    |
| 8F0           | F0               | 8              | 6,762,917                                         | 61,421,024                      | 1,215                  | 235,064                    |
| 9F0           | F0               | 9              | 6,760,330                                         | 59,830,297                      | 3,703                  | 360,105                    |
| 10F0          | F0               | 10             | 6,763,186                                         | 90,549,075                      | 1,728                  | 469,082                    |
| 11F0          | F0               | 11             | 6,761,435                                         | 84,335,355                      | 1,324                  | 132,083                    |
| 12F0          | F0               | 12             | 6,763,038                                         | 90,244,109                      | 2,382                  | 426,787                    |
| 13F0          | F0               | 13             | 6,762,856                                         | 55,517,002                      | 1,601                  | 148,812                    |
| 14F0          | F0               | 14             | 6,763,572                                         | 57,957,367                      | 3,465                  | 434,374                    |
| 15F0          | F0               | 15             | 6,760,230                                         | 94,116,652                      | 1,249                  | 337,881                    |
| 16F0          | F0               | 16             | 6,762,880                                         | 98,099,413                      | 1,589                  | 185,427                    |
| 1F1           | F1               | 1              | 6,749,170                                         | 107,359,637                     | 2,331                  | 339,812                    |
| 2F1           | F1               | 2              | 6,763,158                                         | 89,929,438                      | 1,076                  | 188,424                    |
| 3F1           | F1               | 3              | 6,763,997                                         | 101,358,262                     | 1,693                  | 381,510                    |
| 4F1           | F1               | 4              | 6,763,565                                         | 72,528,185                      | 2,511                  | 422,394                    |
| 5F1           | F1               | 5              | 6,763,687                                         | 86,141,906                      | 2,498                  | 230,323                    |
| 6F1           | F1               | 6              | 6,760,648                                         | 91,515,702                      | 4,430                  | 257,025                    |
| 7F1           | F1               | 7              | 6,762,012                                         | 87,558,094                      | 4,533                  | 551,204                    |
| 8F1           | F1               | 8              | 6,760,674                                         | 67,893,081                      | 1,318                  | 360,598                    |
| 9F1           | F1               | 9              | 6,754,942                                         | 60,872,436                      | 4,433                  | 343,714                    |
| 10F1          | F1               | 10             | 6,763,436                                         | 93,742,679                      | 1,471                  | 492,536                    |
| 11F1          | F1               | 11             | 6,758,394                                         | 98,748,518                      | 1,218                  | 147,992                    |
| 12F1          | F1               | 12             | 6,762,549                                         | 95,703,213                      | 1,883                  | 569,101                    |

## Supplemental Table S3 cont'd

|              |     |    |           |             |       |         |
|--------------|-----|----|-----------|-------------|-------|---------|
| <b>13F1</b>  | F1  | 13 | 6,762,797 | 53,968,796  | 1,634 | 252,023 |
| <b>14F1</b>  | F1  | 14 | 6,763,292 | 70,708,404  | 2,179 | 272,631 |
| <b>15F1</b>  | F1  | 15 | 6,761,152 | 91,424,771  | 1,298 | 239,217 |
| <b>16F1</b>  | F1  | 16 | 6,763,626 | 91,778,142  | 1,535 | 306,862 |
| <b>1F28</b>  | F28 | 1  | 6,747,041 | 110,265,992 | 2,084 | 384,451 |
| <b>2F28</b>  | F28 | 2  | 6,763,805 | 78,515,157  | 1,349 | 201,984 |
| <b>3F28</b>  | F28 | 3  | 6,764,249 | 81,750,725  | 2,511 | 307,209 |
| <b>4F28</b>  | F28 | 4  | 6,763,792 | 72,750,082  | 2,515 | 464,327 |
| <b>5F28</b>  | F28 | 5  | 6,764,222 | 88,617,977  | 2,488 | 339,772 |
| <b>6F28</b>  | F28 | 6  | 6,762,192 | 90,549,814  | 4,752 | 570,885 |
| <b>7F28</b>  | F28 | 7  | 6,764,130 | 90,120,282  | 5,569 | 356,533 |
| <b>8F28</b>  | F28 | 8  | 6,762,965 | 65,060,741  | 1,079 | 563,453 |
| <b>9F28</b>  | F28 | 9  | 6,734,112 | 66,329,318  | 3,148 | 163,253 |
| <b>10F28</b> | F28 | 10 | 6,762,405 | 90,316,754  | 1,437 | 246,435 |
| <b>11F28</b> | F28 | 11 | 6,752,681 | 86,885,619  | 1,304 | 196,830 |
| <b>12F28</b> | F28 | 12 | 6,758,397 | 94,661,520  | 1,836 | 371,293 |
| <b>13F28</b> | F28 | 13 | 6,761,382 | 83,573,595  | 1,079 | 348,663 |
| <b>14F28</b> | F28 | 14 | 6,763,456 | 65,101,671  | 1,895 | 323,984 |
| <b>15F28</b> | F28 | 15 | 6,761,477 | 88,632,315  | 1,130 | 466,403 |
| <b>16F28</b> | F28 | 16 | 6,762,948 | 88,755,813  | 1,535 | 132,163 |
| <b>1S0</b>   | S0  | 1  | 6,758,328 | 127,951,521 | 1,953 | 130,772 |
| <b>2S0</b>   | S0  | 2  | 6,764,123 | 82,944,508  | 1,365 | 359,559 |
| <b>3S0</b>   | S0  | 3  | 6,764,278 | 89,974,540  | 1,735 | 196,149 |
| <b>4S0</b>   | S0  | 4  | 6,764,413 | 84,031,154  | 2,052 | 307,229 |
| <b>5S0</b>   | S0  | 5  | 6,764,550 | 88,782,629  | 2,055 | 377,347 |
| <b>6S0</b>   | S0  | 6  | 6,761,458 | 97,078,021  | 6,156 | 339,172 |
| <b>7S0</b>   | S0  | 7  | 6,764,089 | 89,195,794  | 5,526 | 342,387 |
| <b>8S0</b>   | S0  | 8  | 6,763,099 | 67,389,380  | 1,527 | 281,563 |
| <b>9S0</b>   | S0  | 9  | 6,759,455 | 58,761,694  | 6,742 | 498,810 |
| <b>10S0</b>  | S0  | 10 | 6,762,994 | 96,063,090  | 2,056 | 531,979 |
| <b>11S0</b>  | S0  | 11 | 6,757,354 | 104,894,532 | 1,524 | 323,515 |
| <b>12S0</b>  | S0  | 12 | 6,760,741 | 91,735,170  | 2,552 | 666,167 |
| <b>13S0</b>  | S0  | 13 | 6,763,139 | 90,366,798  | 1,240 | 265,292 |
| <b>14S0</b>  | S0  | 14 | 6,763,483 | 65,994,504  | 2,451 | 290,496 |
| <b>15S0</b>  | S0  | 15 | 6,763,132 | 101,206,424 | 1,001 | 370,298 |
| <b>16S0</b>  | S0  | 16 | 6,763,931 | 99,210,538  | 1,581 | 343,845 |
| <b>1S1</b>   | S1  | 1  | 6,758,715 | 126,658,874 | 2,185 | 99,029  |
| <b>2S1</b>   | S1  | 2  | 6,764,109 | 84,433,091  | 1,348 | 436,834 |
| <b>3S1</b>   | S1  | 3  | 6,764,240 | 92,764,089  | 1,643 | 232,534 |
| <b>4S1</b>   | S1  | 4  | 6,764,437 | 78,793,356  | 2,003 | 306,384 |
| <b>5S1</b>   | S1  | 5  | 6,764,548 | 88,992,920  | 1,941 | 464,483 |
| <b>6S1</b>   | S1  | 6  | 6,761,625 | 99,661,288  | 4,882 | 266,711 |
| <b>7S1</b>   | S1  | 7  | 6,764,116 | 89,505,551  | 4,607 | 201,071 |
| <b>8S1</b>   | S1  | 8  | 6,763,263 | 68,459,681  | 1,481 | 326,852 |
| <b>9S1</b>   | S1  | 9  | 6,759,523 | 61,776,685  | 9,132 | 423,095 |
| <b>10S1</b>  | S1  | 10 | 6,763,174 | 95,518,424  | 1,962 | 302,893 |
| <b>11S1</b>  | S1  | 11 | 6,757,931 | 104,591,990 | 1,574 | 255,349 |
| <b>12S1</b>  | S1  | 12 | 6,762,914 | 92,535,338  | 2,346 | 461,659 |
| <b>13S1</b>  | S1  | 13 | 6,762,898 | 94,660,197  | 1,302 | 401,408 |

### Supplemental Table S3 cont'd

|              |     |    |           |             |        |         |
|--------------|-----|----|-----------|-------------|--------|---------|
| <b>14S1</b>  | S1  | 14 | 6,763,761 | 62,876,815  | 1,878  | 306,861 |
| <b>15S1</b>  | S1  | 15 | 6,763,258 | 102,708,875 | 988    | 611,412 |
| <b>16S1</b>  | S1  | 16 | 6,763,898 | 100,542,883 | 1,469  | 324,109 |
| <b>1S28</b>  | S28 | 1  | 6,756,987 | 123,963,729 | 2,184  | 347,814 |
| <b>2S28</b>  | S28 | 2  | 6,763,911 | 80,578,318  | 1,642  | 143,603 |
| <b>3S28</b>  | S28 | 3  | 6,764,212 | 88,139,626  | 1,902  | 306,150 |
| <b>4S28</b>  | S28 | 4  | 6,764,405 | 74,676,856  | 3,144  | 272,104 |
| <b>5S28</b>  | S28 | 5  | 6,764,535 | 94,106,050  | 1,644  | 339,358 |
| <b>6S28</b>  | S28 | 6  | 6,761,578 | 94,357,330  | 6,109  | 654,454 |
| <b>7S28</b>  | S28 | 7  | 6,762,071 | 85,350,240  | 3,286  | 364,574 |
| <b>8S28</b>  | S28 | 8  | 6,763,042 | 79,355,842  | 1,040  | 347,205 |
| <b>9S28</b>  | S28 | 9  | 6,760,522 | 61,010,633  | 11,366 | 102,166 |
| <b>10S28</b> | S28 | 10 | 6,762,842 | 99,013,378  | 1,608  | 384,385 |
| <b>11S28</b> | S28 | 11 | 6,758,972 | 100,609,435 | 1,632  | 278,698 |
| <b>12S28</b> | S28 | 12 | 6,761,152 | 107,649,527 | 1,373  | 343,194 |
| <b>13S28</b> | S28 | 13 | 6,762,983 | 94,188,864  | 1,333  | 379,193 |
| <b>14S28</b> | S28 | 14 | 6,763,853 | 65,471,122  | 1,657  | 305,052 |
| <b>15S28</b> | S28 | 15 | 6,763,363 | 101,051,271 | 969    | 492,302 |
| <b>16S28</b> | S28 | 16 | 6,763,676 | 97,865,044  | 1,699  | 282,599 |

**Sequencing Assembly Metrics.** Sequencing assembly metrics were tabulated for each sample after normalization of number of non-human passed reads.

| <b>Supplemental Table S4. Sequencing metrics: Wilcoxon Rank Sum analysis results</b> |                      |                |
|--------------------------------------------------------------------------------------|----------------------|----------------|
| <b>Metric</b>                                                                        | <b>Comparison</b>    | <b>p-value</b> |
| % Human reads                                                                        | Basal vs Frozen      | 0.429374065    |
| % Human reads                                                                        | Basal vs Stabilized  | 0.067693846    |
| % Human reads                                                                        | Frozen vs Stabilized | 0.005764041    |
| % Bacterial reads                                                                    | Basal vs Frozen      | 0.208298271    |
| % Bacterial reads                                                                    | Basal vs Stabilized  | 0.693106065    |
| % Bacterial reads                                                                    | Frozen vs Stabilized | 0.239744887    |
| % Archaea reads                                                                      | Basal vs Frozen      | 0.916121258    |
| % Archaea reads                                                                      | Basal vs Stabilized  | 0.342521075    |
| % Archaea reads                                                                      | Frozen vs Stabilized | 0.84646764     |
| % Eukaryota reads                                                                    | Basal vs Frozen      | 0.704176543    |
| % Eukaryota reads                                                                    | Basal vs Stabilized  | 0.543303716    |
| % Eukaryota reads                                                                    | Frozen vs Stabilized | 0.764954314    |
| % Virus reads                                                                        | Basal vs Frozen      | 0.629124013    |
| % Virus reads                                                                        | Basal vs Stabilized  | 0.777214236    |
| % Virus reads                                                                        | Frozen vs Stabilized | 0.950003308    |
| Low quality reads                                                                    | Basal vs Frozen      | 0.316201118    |
| Low quality reads                                                                    | Basal vs Stabilized  | 0.290768656    |
| Low quality reads                                                                    | Frozen vs Stabilized | 0.034736098    |
| Duplicated reads                                                                     | Basal vs Frozen      | 0.188368101    |
| Duplicated reads                                                                     | Basal vs Stabilized  | 0.029644929    |
| Duplicated reads                                                                     | Frozen vs Stabilized | 0.001394051    |
| Contig length                                                                        | Basal vs Frozen      | 0.32903273     |
| Contig length                                                                        | Basal vs Stabilized  | 0.271710278    |
| Contig length                                                                        | Frozen vs Stabilized | 0.098499076    |
| Longest contig                                                                       | Basal vs Frozen      | 0.359364398    |
| Longest contig                                                                       | Basal vs Stabilized  | 0.47130121     |
| Longest contig                                                                       | Frozen vs Stabilized | 0.341523888    |

### **Statistical analysis of Sequencing Assembly Metrics.**

Wilcoxon Ranked Sum test was used to generating *p*-values for pair-wise comparisons of sequencing assembly metrics across sample types, using all samples.

**Supplemental Table S5. Phyla Fold change relative to Basal**

| Phyla         | F0 Fold Change | F1 Fold Change | F28 Fold Change | S0 Fold Change | S1 Fold Change | S28 Fold Change | F0 vs S0 p-value | F1 vs S1 p-value | F28 vs S28 p-value |         |        |         |
|---------------|----------------|----------------|-----------------|----------------|----------------|-----------------|------------------|------------------|--------------------|---------|--------|---------|
| Firmicutes    | -0.01          | -0.62          | 0.04            | 0.09           | 0.15           | 0.21            | 0.6772           | 0.03864          | 0.0155             |         |        |         |
| Firmicutes    | 0.04           | 0.07           | -0.30           | -0.04          | 0.00           | -0.02           |                  |                  |                    |         |        |         |
| Firmicutes    | -0.12          | 0.21           | -0.12           | 0.08           | 0.08           | 0.07            |                  |                  |                    |         |        |         |
| Firmicutes    | -0.14          | -0.42          | -0.40           | 0.14           | -0.13          | 0.08            |                  |                  |                    |         |        |         |
| Firmicutes    | -0.26          | -0.33          | -0.39           | -0.28          | -0.21          | -0.08           |                  |                  |                    |         |        |         |
| Firmicutes    | -0.16          | -0.07          | -0.28           | -0.10          | -0.01          | -0.07           |                  |                  |                    |         |        |         |
| Firmicutes    | 0.23           | 0.31           | 0.52            | 0.40           | 0.40           | 0.29            |                  |                  |                    |         |        |         |
| Firmicutes    | -0.26          | 0.05           | -0.03           | 0.33           | 0.54           | 0.60            |                  |                  |                    |         |        |         |
| Firmicutes    | -0.09          | -0.06          | 0.16            | -0.14          | 0.16           | 0.18            |                  |                  |                    |         |        |         |
| Firmicutes    | 0.04           | 0.00           | -0.12           | 0.15           | 0.10           | 0.25            |                  |                  |                    |         |        |         |
| Firmicutes    | -0.38          | 0.17           | -0.19           | 0.29           | 0.32           | 0.23            |                  |                  |                    |         |        |         |
| Firmicutes    | 0.03           | 0.49           | 0.32            | 0.30           | 0.38           | 0.45            |                  |                  |                    |         |        |         |
| Firmicutes    | 0.07           | -0.03          | 0.90            | 1.26           | 1.26           | 1.36            |                  |                  |                    |         |        |         |
| Firmicutes    | 0.06           | 0.89           | 0.65            | 0.38           | 0.25           | -0.06           |                  |                  |                    |         |        |         |
| Firmicutes    | 0.01           | -0.07          | 0.11            | 0.26           | 0.31           | 0.35            |                  |                  |                    |         |        |         |
| Firmicutes    | 0.05           | -0.26          | -0.31           | 0.33           | 0.27           | 0.30            |                  |                  |                    |         |        |         |
| Bacteroidetes | 0.00           | 0.57           | -0.07           | -0.13          | -0.21          | -0.31           |                  |                  |                    | 0.06396 | 0.4697 | 0.01825 |
| Bacteroidetes | -0.03          | -0.06          | 0.16            | 0.03           | 0.00           | 0.02            |                  |                  |                    |         |        |         |
| Bacteroidetes | 0.06           | -0.21          | 0.07            | -0.06          | -0.07          | -0.05           |                  |                  |                    |         |        |         |
| Bacteroidetes | 0.05           | 0.12           | 0.11            | -0.04          | 0.05           | 0.00            |                  |                  |                    |         |        |         |
| Bacteroidetes | 0.11           | 0.14           | 0.15            | 0.12           | 0.10           | 0.05            |                  |                  |                    |         |        |         |
| Bacteroidetes | 0.09           | 0.05           | 0.13            | 0.06           | 0.02           | 0.06            |                  |                  |                    |         |        |         |
| Bacteroidetes | -0.14          | -0.20          | -0.36           | -0.27          | -0.27          | -0.17           |                  |                  |                    |         |        |         |
| Bacteroidetes | 0.09           | -0.01          | 0.02            | -0.14          | -0.26          | -0.30           |                  |                  |                    |         |        |         |
| Bacteroidetes | 0.01           | -0.06          | -0.08           | 0.06           | -0.01          | -0.11           |                  |                  |                    |         |        |         |
| Bacteroidetes | -0.02          | 0.00           | 0.06            | -0.08          | -0.05          | -0.14           |                  |                  |                    |         |        |         |
| Bacteroidetes | 0.14           | -0.10          | 0.08            | -0.15          | -0.17          | -0.11           |                  |                  |                    |         |        |         |
| Bacteroidetes | 0.06           | -0.42          | -0.16           | -0.07          | -0.14          | -0.17           |                  |                  |                    |         |        |         |
| Bacteroidetes | -0.02          | 0.01           | -0.37           | -0.63          | -0.64          | -0.73           |                  |                  |                    |         |        |         |
| Bacteroidetes | -0.02          | -0.60          | -0.39           | -0.17          | -0.11          | 0.02            |                  |                  |                    |         |        |         |
| Bacteroidetes | 0.00           | 0.18           | 0.02            | -0.28          | -0.35          | -0.40           |                  |                  |                    |         |        |         |
| Bacteroidetes | -0.03          | 0.11           | 0.14            | -0.21          | -0.16          | -0.18           |                  |                  |                    |         |        |         |

**Phyla Fold Change relative to Basal.** A list of the fold changes of Bacteroidetes and Firmicutes phyla relative to Basal for Frozen (F) and Stabilized (S) samples across the time course. F0, F1, F28: Frozen Day 0, Day 1, and Day 28; S0, S1, S28: Stabilized Day 0, Day 1, and Day 28.

**Supplemental Table S6. Richness and SDI scores and statistical analysis results**

| Timepoint | Subject              | Basal SDI        | Basal richness | Frozen SDI  | Frozen richness | Stabilized SDI | Stabilized richness |
|-----------|----------------------|------------------|----------------|-------------|-----------------|----------------|---------------------|
| Day 0     | 1                    | 4.49             | 309            | 4.53        | 315             | 4.59           | 321                 |
| Day 0     | 2                    | 4.09             | 280            | 4.12        | 278             | 4.10           | 282                 |
| Day 0     | 3                    | 4.14             | 266            | 4.14        | 260             | 4.15           | 265                 |
| Day 0     | 4                    | 4.11             | 239            | 4.06        | 233             | 4.15           | 237                 |
| Day 0     | 5                    | 3.96             | 245            | 3.84        | 232             | 3.88           | 243                 |
| Day 0     | 6                    | 4.18             | 258            | 4.10        | 249             | 4.19           | 251                 |
| Day 0     | 7                    | 3.92             | 218            | 4.03        | 237             | 4.06           | 238                 |
| Day 0     | 8                    | 3.41             | 284            | 3.19        | 271             | 3.43           | 280                 |
| Day 0     | 9                    | 3.05             | 191            | 3.00        | 189             | 3.02           | 184                 |
| Day 0     | 10                   | 4.13             | 264            | 4.14        | 265             | 4.21           | 274                 |
| Day 0     | 11                   | 4.02             | 273            | 3.85        | 261             | 4.15           | 274                 |
| Day 0     | 12                   | 3.89             | 243            | 3.86        | 238             | 3.93           | 261                 |
| Day 0     | 13                   | 3.10             | 250            | 3.19        | 257             | 3.92           | 294                 |
| Day 0     | 14                   | 3.62             | 229            | 3.62        | 219             | 3.75           | 239                 |
| Day 0     | 15                   | 4.16             | 302            | 4.15        | 302             | 4.23           | 307                 |
| Day 0     | 16                   | 4.19             | 284            | 4.21        | 285             | 4.30           | 296                 |
| Day 1     | 1                    |                  |                | 4.44        | 306             | 4.54           | 318                 |
| Day 1     | 2                    |                  |                | 4.25        | 302             | 4.15           | 286                 |
| Day 1     | 3                    |                  |                | 4.35        | 290             | 4.21           | 273                 |
| Day 1     | 4                    |                  |                | 3.99        | 228             | 4.04           | 231                 |
| Day 1     | 5                    |                  |                | 3.96        | 243             | 3.88           | 242                 |
| Day 1     | 6                    |                  |                | 4.11        | 257             | 4.21           | 257                 |
| Day 1     | 7                    |                  |                | 4.08        | 256             | 4.07           | 243                 |
| Day 1     | 8                    |                  |                | 3.38        | 285             | 3.47           | 271                 |
| Day 1     | 9                    |                  |                | 2.98        | 194             | 3.12           | 192                 |
| Day 1     | 10                   |                  |                | 4.13        | 265             | 4.20           | 270                 |
| Day 1     | 11                   |                  |                | 4.13        | 281             | 4.16           | 272                 |
| Day 1     | 12                   |                  |                | 4.00        | 262             | 3.95           | 260                 |
| Day 1     | 13                   |                  |                | 3.14        | 258             | 4.00           | 303                 |
| Day 1     | 14                   |                  |                | 3.82        | 254             | 3.71           | 237                 |
| Day 1     | 15                   |                  |                | 4.12        | 300             | 4.24           | 307                 |
| Day 1     | 16                   |                  |                | 4.11        | 272             | 4.30           | 295                 |
| Day 28    | 1                    |                  |                | 4.47        | 311             | 4.54           | 314                 |
| Day 28    | 2                    |                  |                | 3.99        | 274             | 4.08           | 278                 |
| Day 28    | 3                    |                  |                | 4.01        | 257             | 4.11           | 268                 |
| Day 28    | 4                    |                  |                | 3.98        | 229             | 3.93           | 220                 |
| Day 28    | 5                    |                  |                | 3.86        | 232             | 3.81           | 238                 |
| Day 28    | 6                    |                  |                | 4.09        | 248             | 4.11           | 245                 |
| Day 28    | 7                    |                  |                | 4.01        | 242             | 4.07           | 245                 |
| Day 28    | 8                    |                  |                | 3.30        | 286             | 3.54           | 277                 |
| Day 28    | 9                    |                  |                | 3.12        | 205             | 3.00           | 182                 |
| Day 28    | 10                   |                  |                | 4.11        | 265             | 4.19           | 272                 |
| Day 28    | 11                   |                  |                | 3.88        | 261             | 4.12           | 268                 |
| Day 28    | 12                   |                  |                | 3.97        | 252             | 4.26           | 297                 |
| Day 28    | 13                   |                  |                | 3.78        | 290             | 3.95           | 301                 |
| Day 28    | 14                   |                  |                | 3.76        | 243             | 3.68           | 224                 |
| Day 28    | 15                   |                  |                | 4.09        | 295             | 4.20           | 308                 |
| Day 28    | 16                   |                  |                | 4.07        | 275             | 4.29           | 296                 |
| Metric    | Comparison           | Statistical Test |                | p-value     |                 |                |                     |
| Diversity | Frozen vs Time       | 1-way ANOVA      |                | 0.551504762 |                 |                |                     |
| Diversity | Stabilized vs Time   | 1-way ANOVA      |                | 0.968167644 |                 |                |                     |
| Richness  | Frozen vs Time       | 1-way ANOVA      |                | 0.103835023 |                 |                |                     |
| Richness  | Stabilized vs Time   | 1-way ANOVA      |                | 0.96475062  |                 |                |                     |
| Richness  | Frozen vs Stabilized | Rank Sum         |                | 0.106944848 |                 |                |                     |
| Diversity | Frozen vs Stabilized | Rank Sum         |                | 0.001711375 |                 |                |                     |

**Statistical analysis of Diversity.** SDI and richness scores are listed for each sample at each timepoint and treatment. 1-way ANOVA or Wilcoxon Rank Sum tests, as listed, were used to generate p-values comparing richness and diversity scores across sample types.
